# Supplementary material for: Performance of SS304 Modified by Silver Micro/Nano-Dendrite Coating with Hot-Water Super-Repellency in Simulated PEMFC Cathode Environment
Source: MDPI journal article supplement (doi:10.3390/nano12101726), 2022-05-18
Supplement: s1 [file s1]

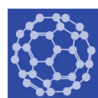

# Performance of SS304 Modified by Silver Micro/Nano-Dendrite Coating with Hot-Water Super-Repellency in Simulated PEMFC Cathode Environment

Junji Xuan <sup>1,2</sup>, Bingzhi Li <sup>2</sup>, Likun Xu <sup>1,2,\*</sup>, Zhaoqi Zhang <sup>2,\*</sup>, Yonglei Xin <sup>2</sup>, Lili Xue <sup>1</sup> and Li Li <sup>1</sup>

<sup>1</sup> College of Materials Science and Chemical Engineering, Harbin Engineering University, Harbin 150001, China; xuanjunji@gmail.com (J.X.); xuelili@hrbeu.edu.cn (L.X.); lili\_heu@hrbeu.edu.cn (L.L.)

<sup>2</sup> State Key Laboratory for Marine Corrosion and Protection, Luoyang Ship Material Research Institute, Qingdao 266237, China; lbz11666888@163.com (B.L.); xinyi@sunrui.net (Y.X.)

\* Correspondence: xulk@sunrui.net (L.X.); zhangzhaoqi527@163.com (Z.Z.)

**Table S1.** The information and content of possible impurities in reagents and solvents, the horizontal line (-) in the table represents unknown.

| Impurities                                         | H <sub>2</sub> SO <sub>4</sub> | HF       | Ethanol   | Acetone | NH <sub>4</sub> OH | n-Dodecyl mercaptan | AgNO <sub>3</sub> |
|----------------------------------------------------|--------------------------------|----------|-----------|---------|--------------------|---------------------|-------------------|
| Burning/evaporation residue                        | ≤ 0.001                        | ≤ 0.002  | ≤ 0.001   | -       | ≤ 0.002            | -                   | -                 |
| Chloride (Cl <sup>-</sup> )                        | ≤ 0.00003                      | ≤ 0.001  | -         | -       | ≤ 0.00005          | -                   | ≤ 0.001           |
| Nitrate (NO <sub>3</sub> <sup>-</sup> )            | ≤ 0.00005                      | -        | -         | -       | -                  | -                   | -                 |
| Sulfate (SO <sub>4</sub> <sup>2-</sup> )           | ≤ 0.002                        | ≤ 0.002  | -         | -       | ≤ 0.0002           | -                   | ≤ 0.004           |
| Phosphate (PO <sub>4</sub> <sup>3-</sup> )         | -                              | ≤ 0.0002 | -         | -       | ≤ 0.0001           | -                   | -                 |
| Fluosilicate (SiF <sub>6</sub> <sup>2-</sup> )     | -                              | ≤ 0.04   | -         | -       | -                  | -                   | -                 |
| Carbonate (CO <sub>3</sub> <sup>2-</sup> )         | -                              | -        | -         | -       | ≤ 0.001            | -                   | -                 |
| Sulfide (S <sup>2-</sup> )                         | -                              | -        | -         | -       | ≤ 0.00002          | -                   | -                 |
| Amine salt (NH <sub>4</sub> <sup>+</sup> )         | ≤ 0.0002                       | -        | -         | -       | -                  | -                   | -                 |
| Na                                                 | -                              | -        | -         | -       | ≤ 0.0005           | -                   | -                 |
| K                                                  | -                              | -        | -         | -       | ≤ 0.0001           | -                   | -                 |
| Mg                                                 | -                              | -        | -         | -       | ≤ 0.0001           | -                   | -                 |
| Ca                                                 | -                              | -        | -         | -       | ≤ 0.0001           | -                   | -                 |
| Fe                                                 | ≤ 0.00005                      | ≤ 0.0001 | -         | -       | ≤ 0.00002          | -                   | ≤ 0.0002          |
| Cu                                                 | ≤ 0.00001                      | -        | -         | -       | ≤ 0.00001          | -                   | ≤ 0.0007          |
| As                                                 | ≤ 0.000003                     | -        | -         | -       | -                  | -                   | -                 |
| Pb                                                 | ≤ 0.00001                      | ≤ 0.0005 | -         | -       | ≤ 0.00005          | -                   | ≤ 0.0007          |
| Potassium permanganate-reducing (SO <sub>2</sub> ) | ≤ 0.0005                       | -        | -         | -       | -                  | -                   | -                 |
| Potassium permanganate-reducing (O)                | -                              | -        | ≤ 0.00025 | -       | ≤ 0.0008           | -                   | -                 |
| Water                                              | -                              | -        | ≤ 0.3     | ≤ 0.3   | -                  | -                   | -                 |
| Ethanol                                            | -                              | -        | -         | ≤ 0.05  | -                  | -                   | -                 |
| Methanol                                           | -                              | -        | ≤ 0.05    | ≤ 0.05  | -                  | -                   | -                 |
| Isopropyl alcohol                                  | -                              | -        | ≤ 0.01    | -       | -                  | -                   | -                 |
